# Supplementary material for: A TLR7 agonist strengthens T and NK cell function during BRAF‐targeted therapy in a preclinical melanoma model
Source: PubMed Central journal article supplement (PMC7003881; doi:10.1002/ijc.32777), 2019-12-04
Supplement: IJC-146-1409-s001.pdf [file IJC-146-1409-s001.pdf]

## **A TLR7 agonist strengthens T and NK cell function during BRAF-targeted therapy in a preclinical melanoma model**

Lydia Bellmann\*, Giuseppe Cappellano\*, Johanna F. Schachtl-Riess, Anastasia Prokopi, Athanasios Seretis, Daniela Ortner, Christoph H. Tripp, Constance E. Brinckerhoff, David W. Mullins, Patrizia Stoitzner

### **Supplementary Material**

Supplementary Figure 1

Supplementary Figure 2

Supplementary Figure 3

Supplementary Figure 4

Supplementary Figure 5

**A**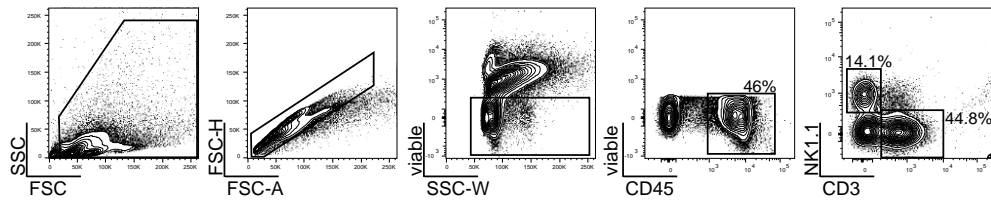**B**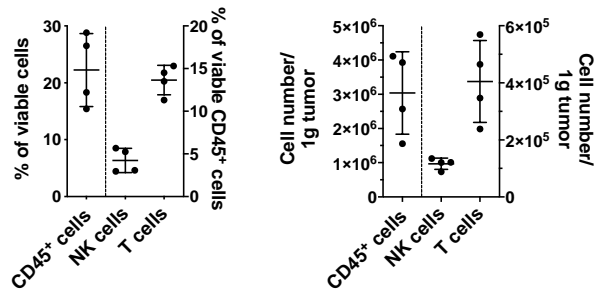

**Supplementary Figure 1: (A)** Gating strategy for the immune cell infiltrate. Immune cells are pre-gated on single, viable cells, then CD45 for all immune cells, followed by NK (NK1.1<sup>+</sup>) as well as (CD3<sup>+</sup>) T cells. Representative example for a BRAFi-sensitive tumor is shown. **(B)** Tumor-infiltrating CD45<sup>+</sup> cells, NK and T cells from tumors analyzed on day 8 after tumor transplantation, the time point when BRAFi treatment was initiated. Results are displayed as percentage as well as cell numbers/gram tumor. Summary graphs for one experiment are shown (n = 4).

**A**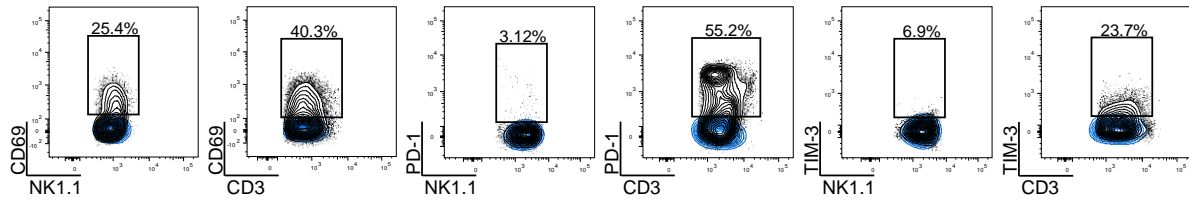**B**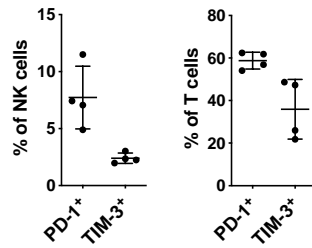

**Supplementary Figure 2:** (A) Gating strategy for CD69, PD-1 and TIM-3 is shown. Cells were pre-gated on single, viable CD45<sup>+</sup> cells. Representative example for a BRAFi-sensitive tumor is shown. FMO or isotype-matched antibodies served as controls (blue). (B) Percentages of PD-1<sup>+</sup> and TIM-3<sup>+</sup> cells of NK and T cells infiltrating tumors dissected on day 8 after tumor transplantation were determined by flow cytometry analysis. Summary graphs for one experiment are shown (n = 4).

**A**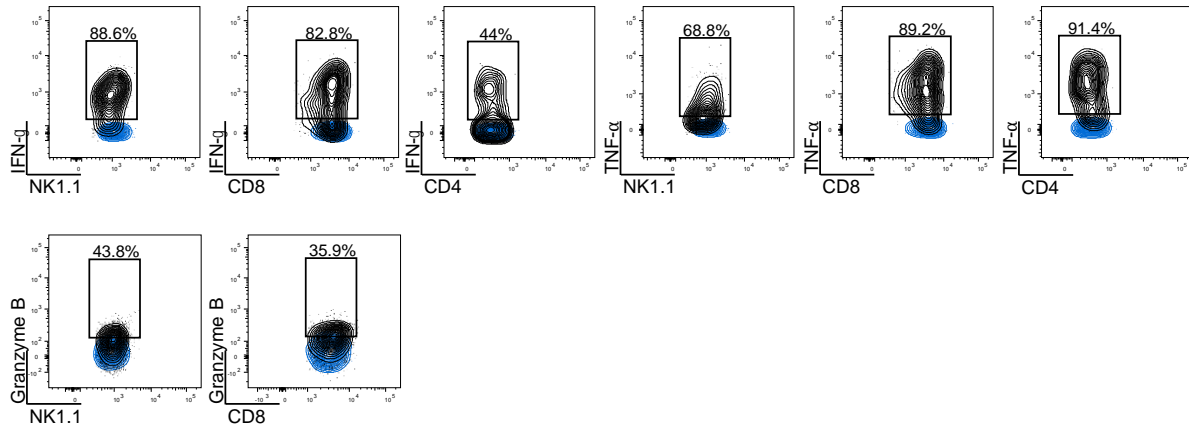**B**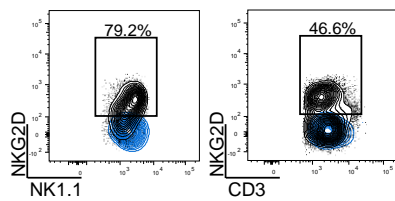**C**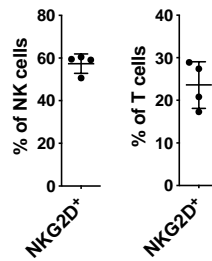

**Supplementary Figure 3: (A and B)** Gating strategy for (A) IFN- $\gamma$ , TNF- $\alpha$  and granzyme B and (B) NKG2D is shown. Cells were pre-gated on single, viable CD45<sup>+</sup> cells. Representative example for a BRAFi-sensitive tumor is shown. FMO or isotype-matched antibodies served as controls (blue). (C) Percentages of NKG2D<sup>+</sup> cells of NK and T cells infiltrating tumors analyzed on day 8 after tumor transplantation were determined by flow cytometry analysis. Summary graphs for one experiment are shown (n = 4).

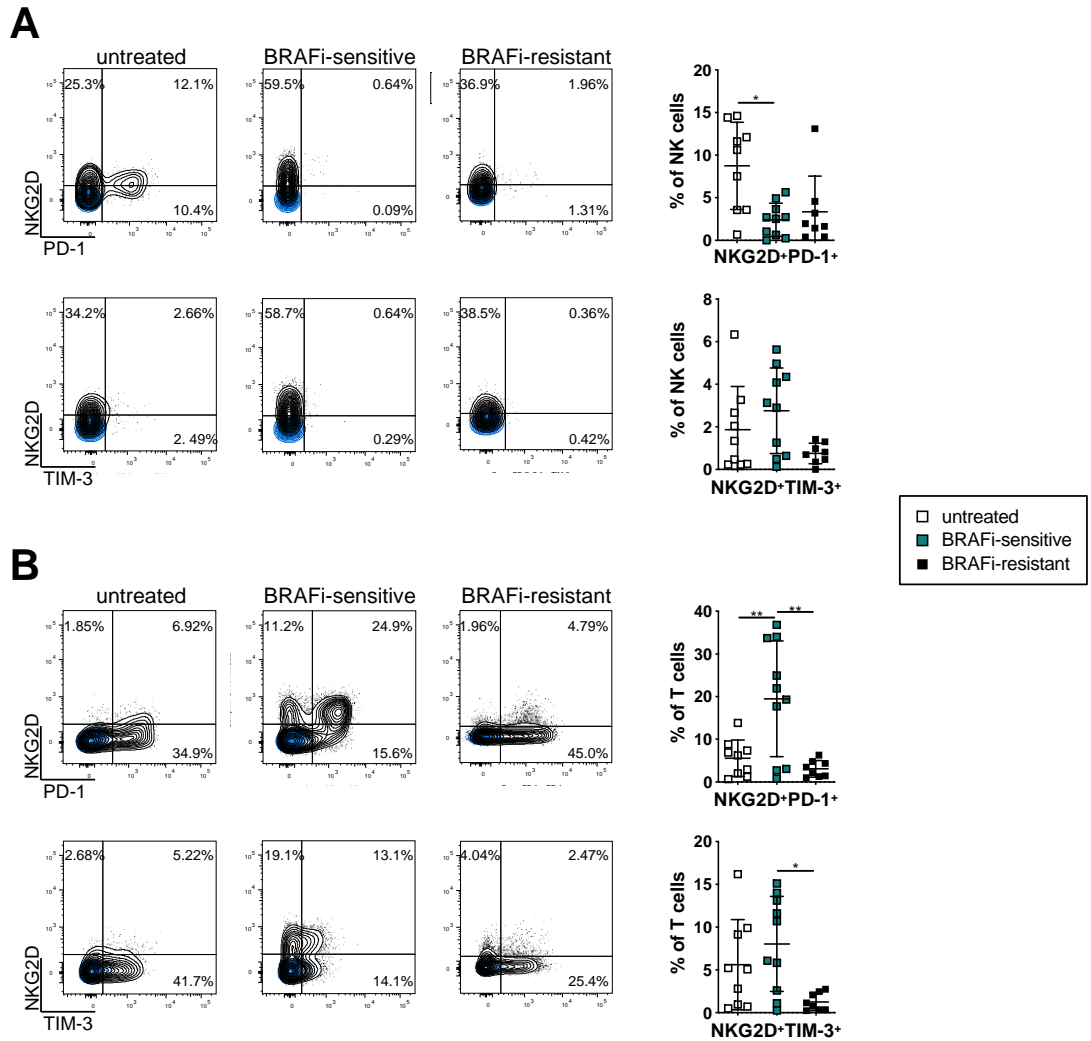

**Supplementary Figure 4: (A and B)** Gating strategy to determine co-expression of NKG2D with PD-1 or NKG2D with TIM-3. Percentages of double-positive cells of (A) NK cells and (B) T cells are shown. Dot plots show representative examples for an untreated, BRAFi-sensitive and BRAFi-resistant tumor. Cells were pre-gated on single, viable CD45<sup>+</sup> cells. FMO or isotype-matched antibodies served as controls (blue). Summary graphs for at least 2 independent experiments are shown (n ≥ 8/group).

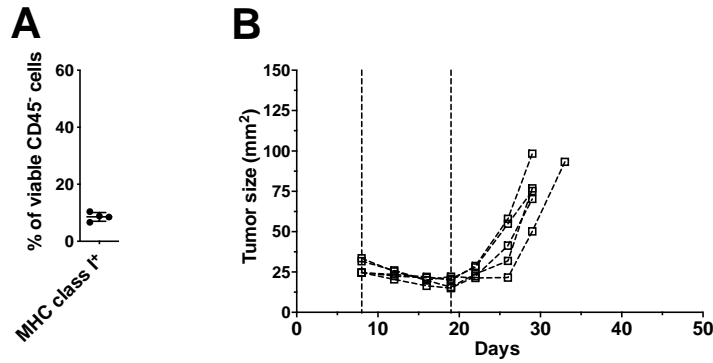

**Supplementary Figure 5:** (A) Percentages of MHC-class I<sup>+</sup> cells of viable CD45<sup>+</sup> tumor cells from tumors analyzed on day 8 after tumor transplantation were determined by flow cytometry analysis. Summary graph for one experiment is shown (n = 4). (B) Tumor growth curve upon s.c. injection with 3x10<sup>5</sup> murine melanoma D4M cells. On day 8 (dotted vertical line), mice were switched to BRAFi-containing chow and on day 19 (second dotted vertical line) mice were switched back to control chow (no BRAFi) and given s.c. peritumorally 2 mg/kg imiquimod (TLR7A). Summary graph for one experiment is shown (n = 5).
